# Supplementary material for: Embryonic Lethality of Mitochondrial Pyruvate Carrier 1 Deficient Mouse Can Be Rescued by a Ketogenic Diet
Source: PubMed Central journal article supplement (PMC4866774; doi:10.1371/journal.pgen.1006056), 2016-05-13

**A****normal diet:  $MPC1^{gt/gt} / MPC1^{+/+}$** 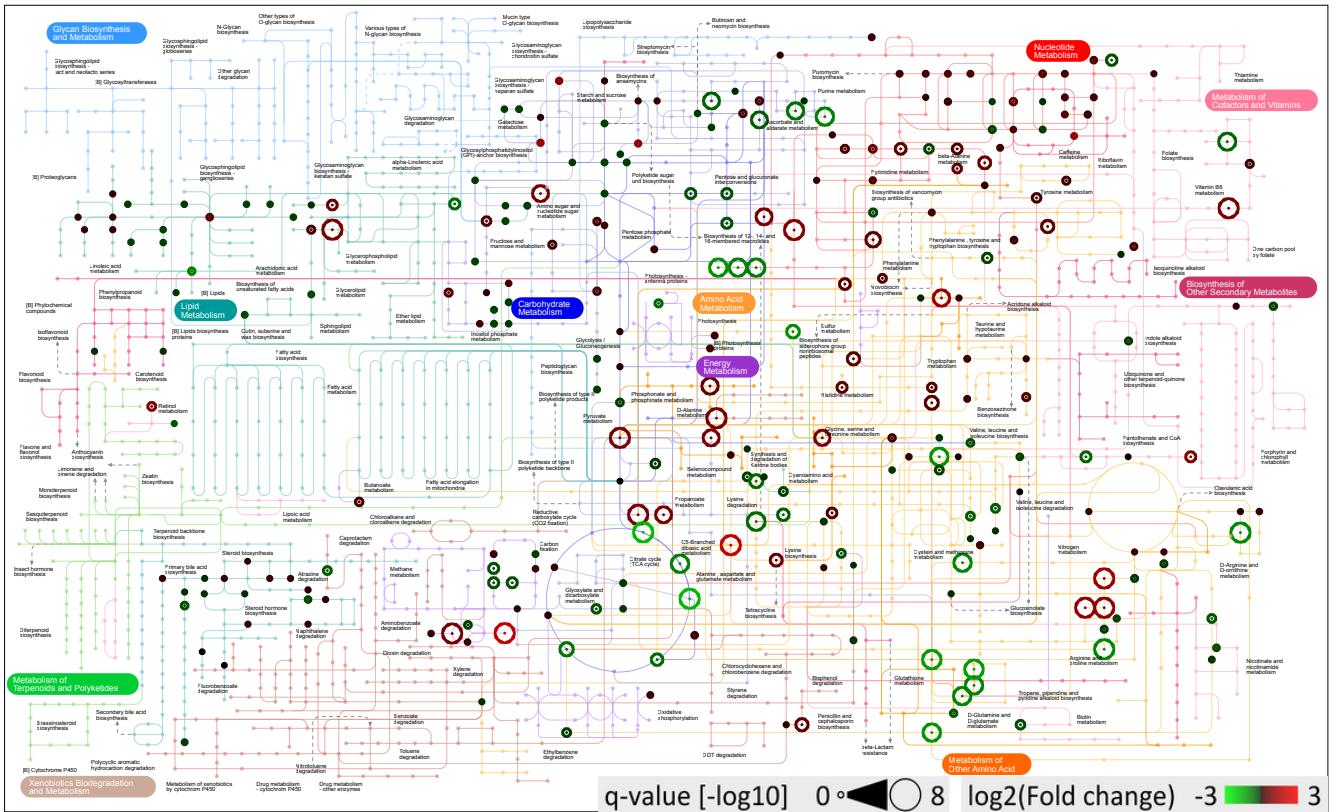**B****ketogenic diet:  $MPC1^{gt/gt} / MPC1^{+/+}$** 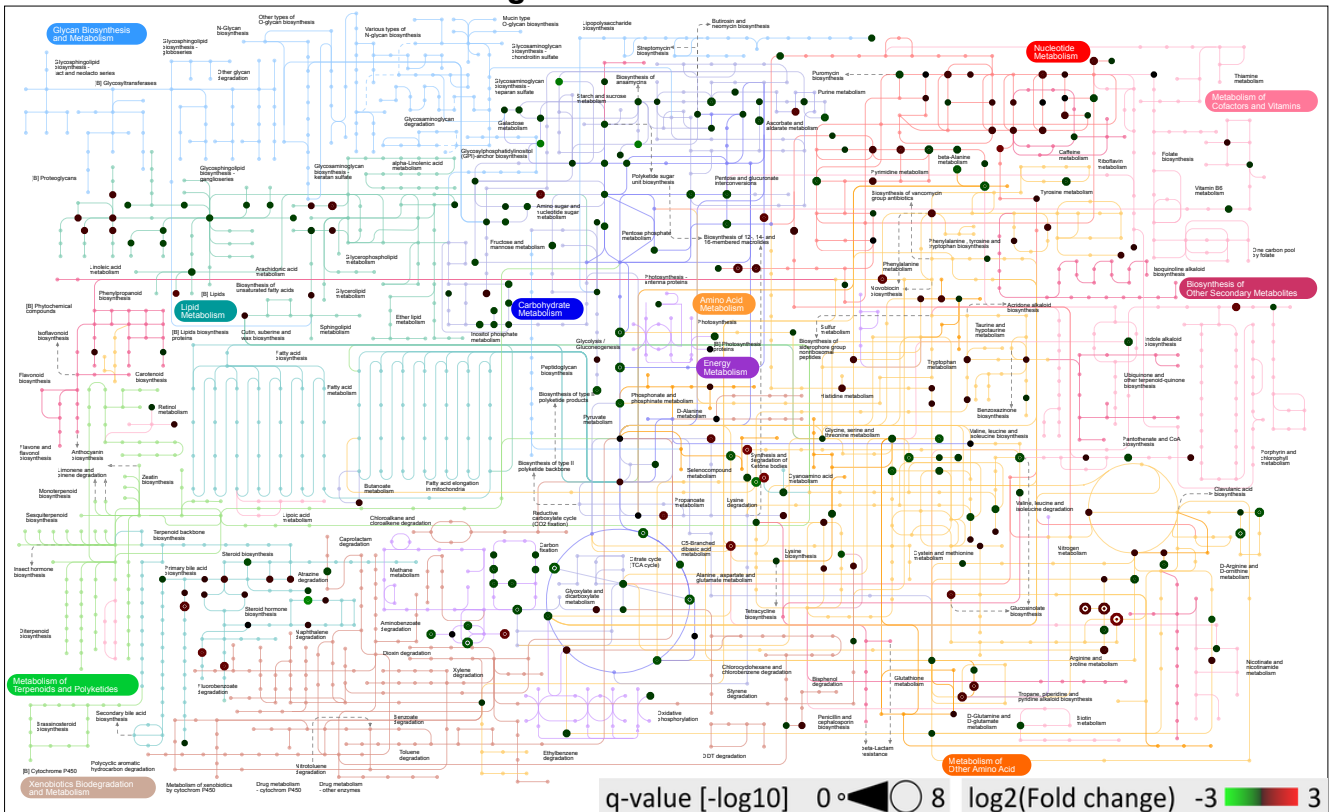

Supplement: pgen.1006056.s002.pdf [file pgen.1006056.s002.pdf]
